# Supplementary material for: Social determinants of health impacting adherence to diabetic retinopathy examinations
Source: HighWire-hosted journal article supplement (doi:10.1136/bmjdrc-2021-002374), 2021-09-01
Supplement: bmjdrc-2021-002374supp001_data_supplement.pdf [file bmjdrc-2021-002374supp001_data_supplement.pdf]

Supplemental Table 1: Key Definitions

|                                           | Definitions                                                                                                                                                                                                                                                                                                                                                                                           |
|-------------------------------------------|-------------------------------------------------------------------------------------------------------------------------------------------------------------------------------------------------------------------------------------------------------------------------------------------------------------------------------------------------------------------------------------------------------|
| Type 2 diabetes mellitus                  | ICD-10* codes: anything that starts with E08, E09, E11, E13<br>1. Qualifying codes associated with a single inpatient encounter<br>2. Qualifying codes associated with two separate outpatient visits (including emergency department encounters)<br>3. Qualifying codes associated with a single outpatient encounter and concurrent diabetes medications                                            |
| Type 1 diabetes mellitus                  | The following criteria must be met:<br>1. > 50% of ICD-10 codes are for type 1 diabetes mellitus (anything that starts with ICD-10 code E10)<br>2. Has a prescription for the medication insulin                                                                                                                                                                                                      |
| Diabetes medications class                | 1. Amylin analogs<br>2. Dipeptidyl peptidase IV (DPP-IV) inhibitors<br>3. Glucagon-like peptide-1 (GLP-1) receptor agonists<br>4. Insulin, insulin analog<br>5. Meglitinide combinations<br>6. Metformins and metformin-sulfonylurea combinations<br>7. SGLT2 inhibitors<br>8. Thiazolidinediones<br>9. Sulfonylureas<br>10. Dopamine-2 agonist (Cycloset, 0.8mg)<br>11. Alpha-glucosidase inhibitors |
| Eye Exam                                  | Any of the following:<br>1. CPT** codes: 92002, 92004, 92012, 92014, 67028, 67210, 67101, 67105, 67141, 67145, 67201, 67228, 92134, 92133, 92250, 92242, 92235, 92240, 92230, 76512, 92225, 92226, 92201, 92202<br>2. CPT codes: 99201 - 99205, 99211 - 99215, 99024, 99025 + provider type optometrist or ophthalmologist                                                                            |
| History of Eye Disease                    | Any of the following:<br>H00-H59                                                                                                                                                                                                                                                                                                                                                                      |
| History of Diabetic Eye Disease Treatment | Any of the following:<br>CPT codes: 67028, 67210, 67228                                                                                                                                                                                                                                                                                                                                               |

\* International Classification of Diseases

\*\* Current Procedural Terminology
